# Supplementary material for: Tracking Li atoms in real-time with ultra-fast NMR simulations
Source: Royal Society of Chemistry journal article supplement (doi:10.1039/d4fd00074a), 2024-05-03
Supplement: d4fd00074a1.pdf [file d4fd00074a1.pdf]

## Supporting Information for “Tracking Li atoms in real-time with ultra-fast NMR simulations”

Angela F. Harper<sup>1</sup>, Tabea Huss<sup>1</sup>, Simone S. Köcher<sup>1,2</sup>, and Christoph Scheurer<sup>1</sup>

<sup>1</sup>Fritz-Haber Institute of the Max Planck Society, Berlin (DE), <sup>2</sup>Institut für Energie und Klimaforschung (IEK-9), Forschungszentrum Jülich GmbH, Jülich, (DE)

### Appendix A: ML-EFG model hyperparameter optimization

All DFT calculations were performed with CASTEP v22.1 [1] using the C19 pseudopotential set and PBE exchange correlation functional [2]. The individual components of the EFG tensor,  $V_{ij}$ , were converged to within  $4 \times 10^{-3} \text{ V}/\text{\AA}^2$  at a plane wave cutoff of 1200 eV and k-point spacing of  $0.03 \times 2\pi \text{\AA}^{-1}$ . The ML-EFG approach uses  $\lambda$ -SOAP as the descriptor [3] which has hyperparameters  $l$ ,  $n$ ,  $r_c$ , and  $\sigma$ . These describe the number of angular components, number of radial components, cutoff radius, and Gaussian width of the descriptor. These hyperparameters were optimized using a combination of a Box-Behnken [4] design-of-experiment approach with 5-fold cross validation across a training set of 11,391 Li EFG tensors (80% of the total dataset). The optimal hyperparameters are  $l = 6$ ,  $n = 6$ ,  $r_c = 6.0$  and  $\sigma = 0.3$ , which have a mean absolute error (MAE) of 7.4 kHz in  $\omega_Q$  over the remaining 3057 Li environments (20% of the total data set) in the test set, which was withheld from cross validation. The MAE in  $C_Q$  and  $\eta$  is given in Figure S1. There is good Pearson correlation in both cases ( $r > 0.85$ ) and low MAE (6.8 kHz MAE in  $C_Q$  and 0.99 MAE in  $\eta$ ).

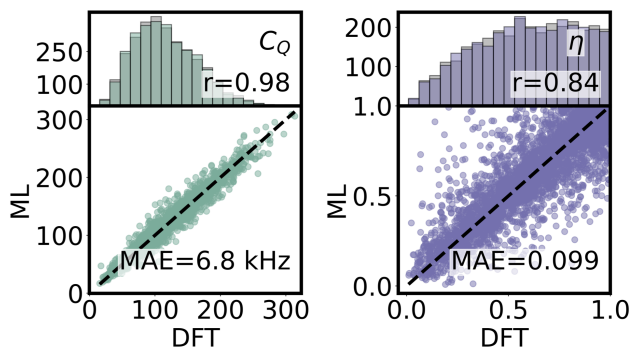

FIG. S1. MAE over test set for  $C_Q$  and  $\eta$  Histogram and correlation plot for  $C_Q$  and  $\eta$  evaluated over the 20% separated test set of 2057 Li environments in the ML-EFG model.

By testing the model using 11,391 Li EFG tensors on four additional large-scale structures withheld from training (results shown in Figure S2), we show that the ML-EFG model can be extended to the large LPS structures in our  $\beta$ -LPS and am-LPS simulations. The MAE in  $\omega_Q$  over four large structures extracted from the UFP-MD trajectories is 9.2 kHz, which is within experimental ac-

curacy of  ${}^7\text{Li}$  SAE.

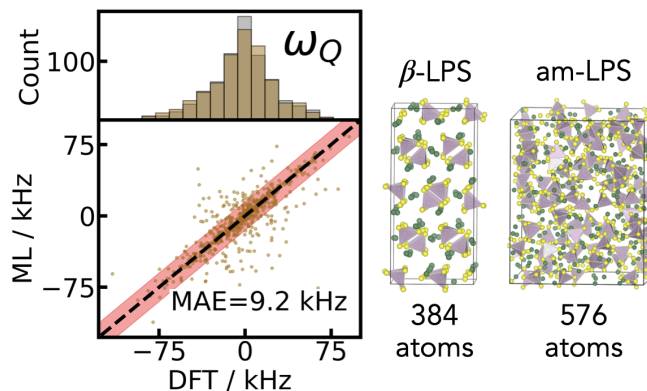

FIG. S2. MAE in  $\omega_Q$  for four large structures extracted from the UFP-MD trajectories The left panel shows the MAE and distribution of  $\omega_Q$  for a set of two  $\beta$ -LPS and two am-LPS structures extracted from the  $1 \mu\text{s}$  UFP-MD simulations. Two of the structures are shown in the right panel, with  $\text{PS}_4$  tetrahedra shown in purple (P) and yellow (S) and Li atoms shown in green.

### Appendix B: Calculating autocorrelation functions

For all autocorrelation function calculations of  $\beta$ - and am-LPS, snapshots were extracted every 100 ps across the full trajectory. For the  $1 \mu\text{s}$  calculations, this resulted in 10,000 total snapshots over which the  ${}^7\text{Li}$  EFG tensors were predicted. The am-LPS structure has 576 atoms total with the stoichiometry  $\text{Li}_3\text{PS}_4$ , so there are a total of 216 Li atom trajectories in am-LPS over which the  $\langle \text{ACF}_{\omega_Q} \rangle$  is averaged. For  $\beta$ -LPS there are 144 Li atoms, which  $\langle \text{ACF}_{\omega_Q} \rangle$  is averaged over, and for  $\langle \text{ACF}_{C_Q} \rangle$ , the average is taken over only the Li ions which hop during the simulation (13 sites at 300 K and 102 sites at 350 K).

Both  $\langle \text{ACF}_{\omega_Q} \rangle$  and  $\langle \text{ACF}_{C_Q} \rangle$  were calculated using a sliding window averaging method in order to reduce the numerical noise between  $\bar{\omega}_Q$  or  $\bar{C}_Q$  at different timesteps,  $t_i$ . The sliding window average was 10 ns for  $\langle \text{ACF}_{\omega_Q} \rangle$  and 1 ns for  $\langle \text{ACF}_{C_Q} \rangle$ . For the individual atom  $\text{ACF}_{C_Q}$  shown in Figures 5 and S3, the window was 10 ns to highlight the differences between  $\text{LiS}_4$  and  $\text{LiS}_6$ . We can justify the validity of using the sliding window averaging through ergodicity, as averaging over a longer timescale is equivalent to averaging over a larger number of Li atoms at a fixed time. In addition, in order to account for the equilibration within the am-LPS structure, the initial  $\omega_Q(t_0)$  used to reference the  $\langle \text{ACF}_{\omega_Q} \rangle$  was taken as the average over the first 100 frames, or

$\langle\omega_Q(t_0), \omega_Q(t_1), \dots, \omega_Q(t_{100})\rangle$ . Finally, the  $\langle\text{ACF}_{\omega_Q}\rangle$  is normalized between  $[0, 1]$ .

### Appendix C: Simulations at 350 K

Given the slow diffusion time in  $\beta$ -LPS, there are a low number of hops (13 in total out of 144 Li atoms) at 300 K, and for that reason, we have included another trajectory at 350 K for  $\beta$ -LPS which has 102 hops in  $1 \mu\text{s}$ . The corresponding hopping rate at 350 K is  $1.70 \times 10^6 \text{ s}^{-1}$ , as extracted from the  $\langle\text{ACF}_{C_Q}\rangle$  shown in Figure S3. This is an order of magnitude faster than for  $\beta$ -LPS at 300 K, which is the expected difference in hopping rates between these two temperatures.

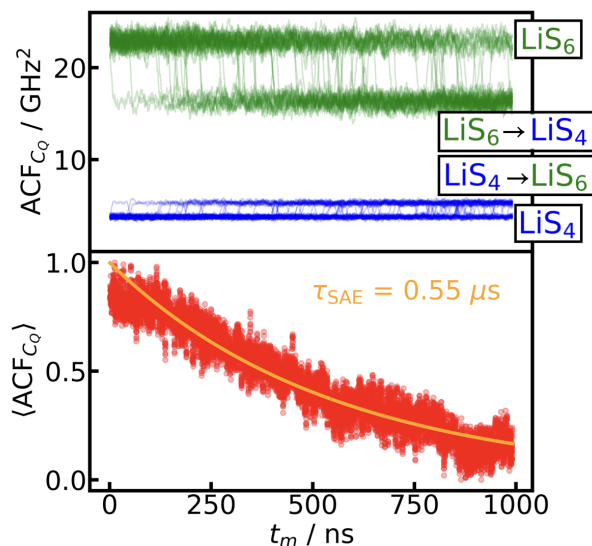

FIG. S3.  $\langle\text{ACF}_{C_Q}\rangle$  for  $\beta$ -LPS at 350 K The calculated  $\langle\text{ACF}_{C_Q}\rangle$  for a  $1 \mu\text{s}$  trajectory of  $\beta$ -LPS at 350 K gives a decay rate of  $0.59 \mu\text{s}$  or a Li hopping rate of  $1.70 \times 10^6 \text{ s}^{-1}$ . Of the total 144 Li atoms in the cell, 102 atoms experienced a Li hopping event during the  $1 \mu\text{s}$  simulation. The top panel distinguishes hopping events based on the initial site the Li atom was in at time  $t = 0$ . Initial  $\text{LiS}_6$  sites (green) and initial  $\text{LiS}_4$  sites (blue). The  $\text{ACF}_{C_Q}$  of each hopping event is labeled.

In addition to the  $\langle\text{ACF}_{C_Q}\rangle$  over the  $1 \mu\text{s}$  simulation, we also compare the angles  $\theta$  and  $\phi$  across the different sites in  $\beta$ -LPS in Figure S4. In the top panel, we find that for the Li atoms which remained in their original site, the angles  $(\theta, \phi)$  were centered around  $(\pi/2, 0)$  for  $\text{LiS}_4$  tetrahedra and  $(\pi/2 \pm \pi/6, \pm \pi/4)$  for  $\text{LiS}_6$ . For the Li sites which experience a hopping event at some point during the  $1 \mu\text{s}$  simulation, we separate these into Li-ions which started out at a  $\text{LiS}_4$  and  $\text{LiS}_6$  site, respectively. As expected, the distribution of angles is wider for the hopping sites than for those that do not hop, but the majority of the hopping sites are  $\text{LiS}_6$  sites which hop to another  $\text{LiS}_6$  site. We can see this in the  $\text{LiS}_6$  hop histogram (bottom right Figure S4) which has the highest

density of  $(\theta, \phi)$  at  $(\pi/2 \pm \pi/6, \pm \pi/4)$ , which are all  $\text{LiS}_6$  sites. Whereas, the  $\text{LiS}_4$  hopping sites have a distribution of angles at both  $(\pi/2 \pm \pi/6, \pm \pi/4)$ , and  $(\pi/2, 0)$ , indicating that some ions from  $\text{LiS}_4$  sites hop into  $\text{LiS}_6$  sites. However, all of these hopping events are masked in the  $\langle\text{ACF}_{\omega_Q}\rangle$ , as in Figure 3, and are only shown here in Figure S4 by decomposing the Li trajectories by their angular components.

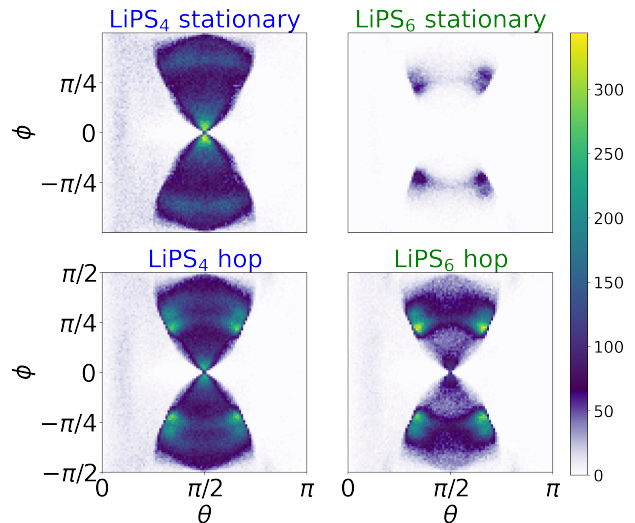

FIG. S4. Distribution of  $\theta$  and  $\phi$  in  $\beta$ -LPS MD at 350 K separated by local environment. The four heatmaps show, qualitatively, the different angular environments accessed during the  $1 \mu\text{s}$  simulation for sites which do not experience a hopping event (top) and sites which do experience a hopping event (bottom) starting from either an  $\text{LiS}_4$  or  $\text{LiS}_6$  site. The histograms are colored by the number of Li sites across the trajectory which have a given  $(\theta, \phi)$ .

### Appendix D: Technical details of the UFP fitting

The UFP-MD simulations for training are executed at temperatures ranging from 300 K to 1000 K, using a time step of 2 fs, and a simulation time of either 1 ns or  $1 \mu\text{s}$  in the NpT ensemble. All DFT reference calculations used for generating the UFP are performed using FHI-AIMS [5], the PBE exchange-correlation functional [6] and a  $2 \times 2 \times 2$  k-point sampling. Hyperparameter optimization was performed and the results are shown in Table I. The RDFs of  $\beta$ -LPS and am-LPS compared to AIMD from [7, 8] are shown in Figure S5.

Finally, to compare the atom dynamics in the UFP versus another high quality machine learning potential for LPS, we simulated a 1 ns trajectory at 500 K for both  $\beta$ - and am-LPS using the UFP [9] and TurboGAP [10]. The resulting MSDs are shown in Figure S6, and we find that for am-LPS the MSD is comparable between TurboGAP and the UFP, and for  $\beta$ -LPS we have a five times faster transport in the TurboGAP compared to UFP. This can be explained by a insufficient barrier sampling in the approaches, as the fitting of the interatomic potentials is done using snapshots from MD simulations. Those snap-

TABLE I. Hyperparameters of the UFP

| Description              | 2B    | 3B    |
|--------------------------|-------|-------|
| cutoff                   | 6 Å   | 5 Å   |
| lower cutoff             | 1 Å   | 1 Å   |
| spline distance          | 0.4 Å | 0.4 Å |
| ridge regularisation     | 1e-5  | 1e-6  |
| curvature regularisation | 1e-5  | 1e-5  |
| $\kappa$                 |       | 0.1   |
| leading trim             |       | 0     |
| trailing trim            |       | 3     |

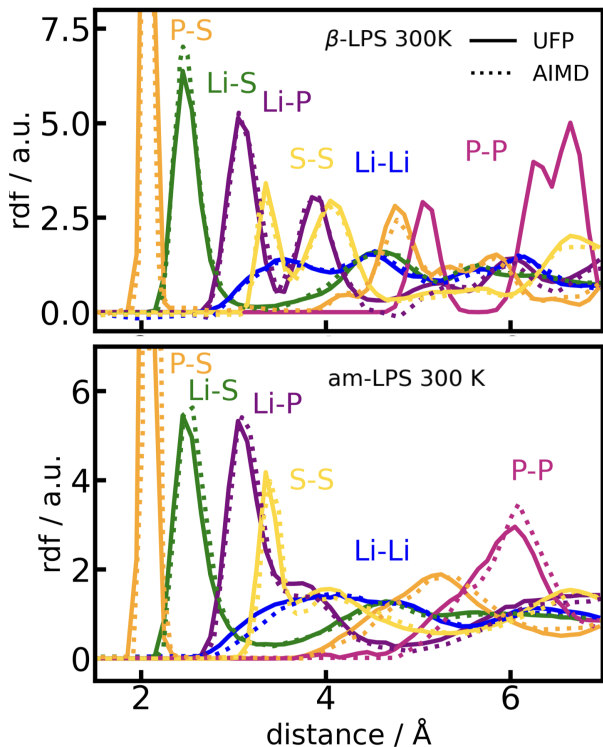

FIG. S5. Radial distribution functions of  $\beta$ -LPS and am-LPS in comparison to AIMD references.  $\beta$ -LPS (top) is compared to the AIMD RDF from Sadowski *et al.* [7] and am-LPS (bottom) to the AIMD RDF from Smith *et al.* [8].

shots are strongly biased towards the minima and a better estimate of the barrier height could be achieved by including nudged elastic band [11] trajectories from DFT into the training sets of both MLIPs.

#### Appendix E: Technical details of jump detection

For the discretization in order to detect jumps, we utilize a hopping classification inspired by Smith *et al.* [8],

$$h_i(t, a) = \theta(|r_i(t) - r_i(t_0)| - a), \quad (\text{S1})$$

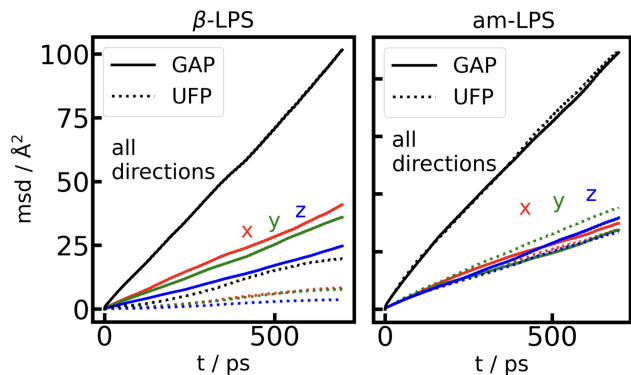

FIG. S6. Mean square displacement of a 1 ns MD run of  $\beta$ -LPS and am-LPS at 500 K. The MSD for  $\beta$ -LPS (left) and am-LPS (right) is compared between 1 ns simulations in TurboGAP [10] and UFP [9] in order to validate the Li diffusion behavior in the UFP model.

where  $\theta$  is the Heaviside function and  $a$  is a threshold of square displacement. We set  $a$  to 3 Å and provide a sensitivity analysis for this parameter (Figure S7). The hopping detection method, Equation S1, is run over a single Li trajectory until a hop is detected, and then repeated iteratively, using the detected hopping point as a new starting point. Also an additional filter is used which ensures a residence time of 0.5 ns to exclude jump attempts from the detection. Examples of discretized Li squared displacement trajectories of the  $\beta$ -LPS are shown in Figure 2 (right).

We test the sensitivity of the calculated jump frequency from MD simulations on the selected threshold  $a$  from Equation S1 and show the result in Figure S7. We find a plateau between 2.8 and 3.2 Å and thus select a cutoff of 3 Å.

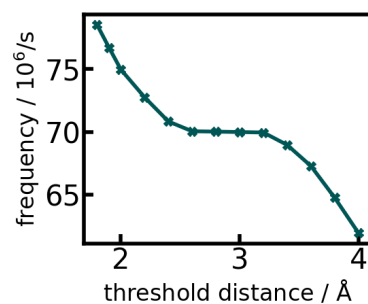

FIG. S7. Sensitivity of the computed jump frequency on the selected threshold  $a$  of the absolute displacement for am-LPS. By varying the threshold distance,  $a$  for computing a jump frequency we find a window in which the jump frequency is stable (between 2.8 and 3.2 Å) and use this to select the optimal threshold distance, 3.0 Å.

- 
- [1] S. J. Clark, M. D. Segall, C. J. Pickard, P. J. Hasnip, M. I. Probert, K. Refson, and M. C. Payne, First principles methods using CASTEP, *Z. Kristallogr. Cryst. Mater.* **220**, 567 (2005).
- [2] J. P. Perdew, K. Burke, and M. Ernzerhof, Generalized gradient approximation made simple, *Phys. Rev. Lett.* **77**, 3865 (1996).
- [3] A. Grisafi, D. M. Wilkins, G. Csányi, and M. Ceriotti, Symmetry-adapted machine learning for tensorial properties of atomistic systems, *Physical Review Letters* **120**, 036002 (2018).
- [4] G. E. Box and N. R. Draper, *Empirical model-building and response surfaces*. (John Wiley & Sons, 1987).
- [5] V. Blum, R. Gehrke, F. Hanke, P. Havu, V. Havu, X. Ren, K. Reuter, and M. Scheffler, Ab initio molecular simulations with numeric atom-centered orbitals, *Computer Physics Communications* **180**, 2175 (2009).
- [6] J. P. Perdew, K. Burke, and M. Ernzerhof, Generalized gradient approximation made simple, *Physical Review Letters* **77**, 3865 (1996).
- [7] M. Sadowski and K. Albe, Computational study of crystalline and glassy lithium thiophosphates: Structure, thermodynamic stability and transport properties, *Journal of Power Sources* **478**, 229041 (2020).
- [8] J. G. Smith and D. J. Siegel, Low-temperature paddle-wheel effect in glassy solid electrolytes, *Nature Communications* **11**, 10.1038/s41467-020-15245-5 (2020).
- [9] S. R. Xie, M. Rupp, and R. G. Hennig, Ultra-fast interpretable machine-learning potentials, *npj Computational Materials* **9**, 162 (2023).
- [10] M. A. Caro, Optimizing many-body atomic descriptors for enhanced computational performance of machine learning based interatomic potentials, *Physical Review B* **100**, 024112 (2019).
- [11] H. Jónsson, G. Mills, and K. W. Jacobsen, Nudged elastic band method for finding minimum energy paths of transitions, in *Classical and Quantum Dynamics in Condensed Phase Simulations* (World Scientific, 1998).
